# Supplementary material
Source: PubMed Central journal article supplement (PMC3339320)
Supplement: supp_msr310_MSR310_supp_figureS1.pdf [file supp_msr310_MSR310_supp_figureS1.pdf]

### Splice variant 1

|                                  | 10                  | 20                  | 30                  | 40                  | 50                          |
|----------------------------------|---------------------|---------------------|---------------------|---------------------|-----------------------------|
| <i>Eonycteris spelaea</i>        | R E L A L L F E H V | Q R A R N G G L R P | L E V R R A P V P D | G A P S R Y P P V A | T C H R P G S A S F C P G E |
| <i>Rousettus leschenaultii</i>   | .                   | .                   | .                   | .                   | .                           |
| <i>Cynopterus sphinx</i>         | .                   | .                   | .                   | .                   | .                           |
| <i>Pteropus vampyrus</i>         | .                   | .                   | .                   | .                   | .                           |
| <i>Hipposideros pratti</i>       | .                   | .                   | .                   | .                   | F                           |
| <i>Rhinolophus ferrumequinum</i> | .                   | .                   | .                   | .                   | F                           |
| <i>Rhinolophus pusillus</i>      | .                   | .                   | .                   | .                   | F                           |
| <i>Rhinopoma hardwickii</i>      | .                   | .                   | .                   | C                   | .                           |
| <i>Megaderma lyra</i>            | .                   | .                   | V                   | .                   | .                           |
| <i>Tadarida plicata</i>          | .                   | .                   | .                   | .                   | .                           |
| <i>Miniopterus fuliginosus</i>   | .                   | .                   | .                   | .                   | .                           |
| <i>Murina leucogaster</i>        | .                   | .                   | .                   | .                   | I T                         |
| <i>Myotis lucifugus</i>          | .                   | .                   | .                   | .                   | T                           |

### Splice variant 2

|                                  | 10                  |                   |
|----------------------------------|---------------------|-------------------|
| <i>Eonycteris spelaea</i>        | S Q M F S N K R S F | F R I H A S W R P |
| <i>Rousettus leschenaultii</i>   | .                   | .                 |
| <i>Cynopterus sphinx</i>         | .                   | .                 |
| <i>Pteropus vampyrus</i>         | S                   | .                 |
| <i>Hipposideros armiger</i>      | .                   | .                 |
| <i>Hipposideros pratti</i>       | .                   | .                 |
| <i>Hipposideros ater</i>         | .                   | .                 |
| <i>Rhinolophus ferrumequinum</i> | .                   | .                 |
| <i>Rhinolophus pusillus</i>      | .                   | .                 |
| <i>Rhinopoma hardwickii</i>      | .                   | .                 |
| <i>Megaderma lyra</i>            | .                   | .                 |
| <i>Artibeus lituratus</i>        | .                   | .                 |
| <i>Mormoops megalophylla</i>     | .                   | .                 |
| <i>Pteronotus parnellii</i>      | .                   | .                 |
| <i>Tadarida plicata</i>          | .                   | .                 |
| <i>Miniopterus fuliginosus</i>   | .                   | .                 |
| <i>Barbastella beijingensis</i>  | .                   | .                 |
| <i>Pipistrellus abramus</i>      | .                   | .                 |
| <i>Murina leucogaster</i>        | .                   | .                 |
| <i>Myotis lucifugus</i>          | .                   | .                 |
| <i>Myotis ricketti</i>           | .                   | .                 |

### Splice variant 3

|                           | 10                  |           |
|---------------------------|---------------------|-----------|
| <i>Eonycteris spelaea</i> | S W R E E E A A G H | R C L R L |
| <i>Pteropus vampyrus</i>  | .                   | .         |
| <i>Myotis lucifugus</i>   | .                   | .         |
