# Supplementary material
Source: PubMed Central journal article supplement (PMC3339320)

A

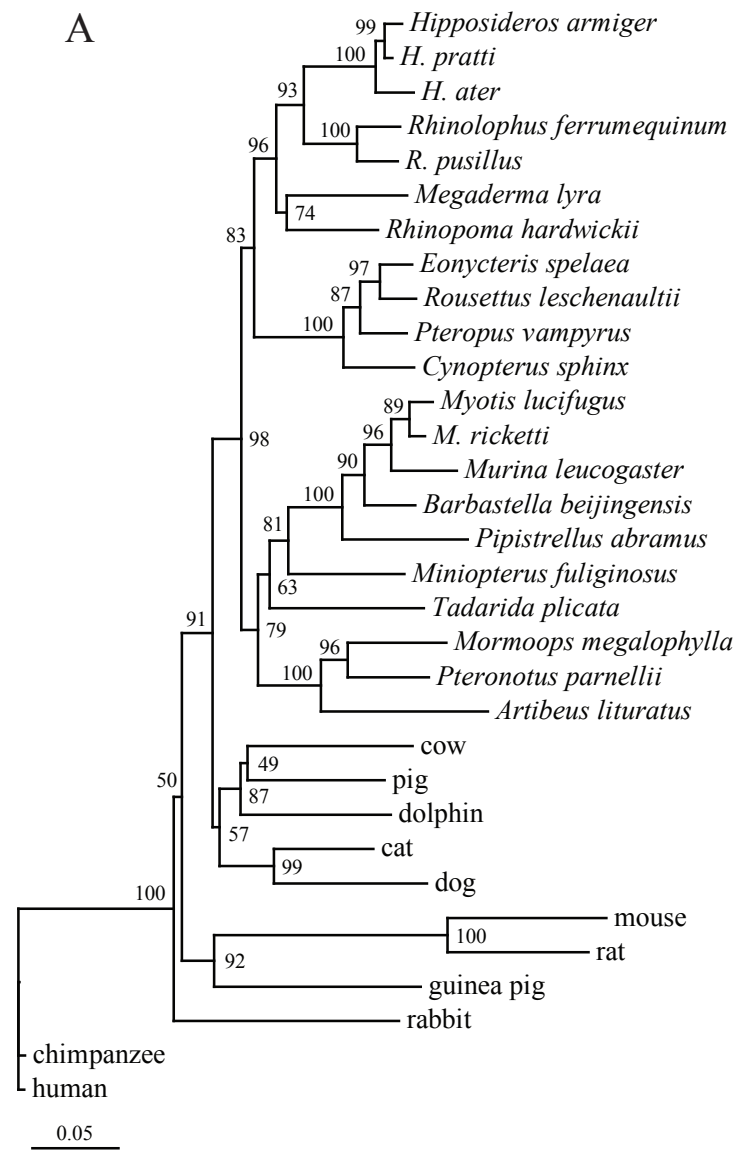

B

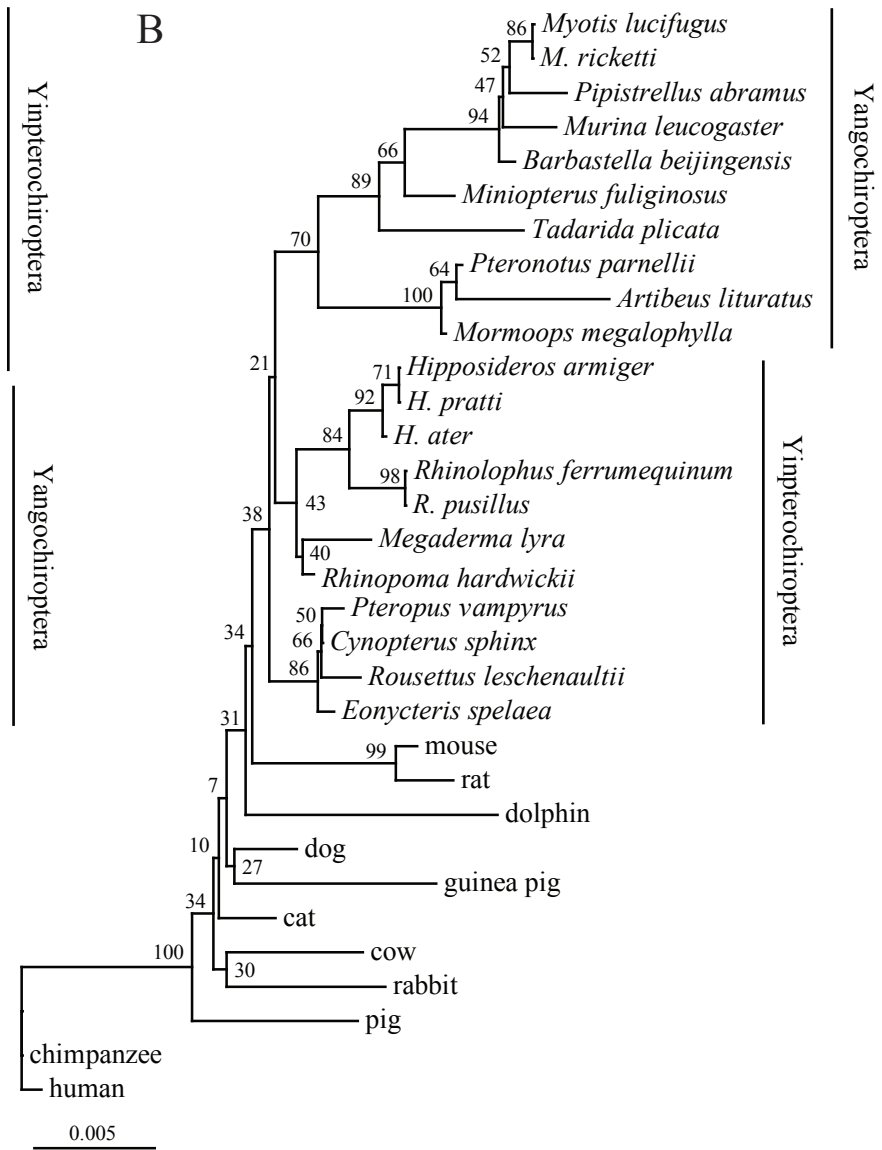

Supplement: supp_msr310_MSR310_supp_figureS3.pdf [file supp_msr310_MSR310_supp_figureS3.pdf]
