# Supplementary material
Source: PubMed Central journal article supplement (PMC3339320)
Supplement: supp_msr310_MSR310_supp_figureS4.pdf [file supp_msr310_MSR310_supp_figureS4.pdf]

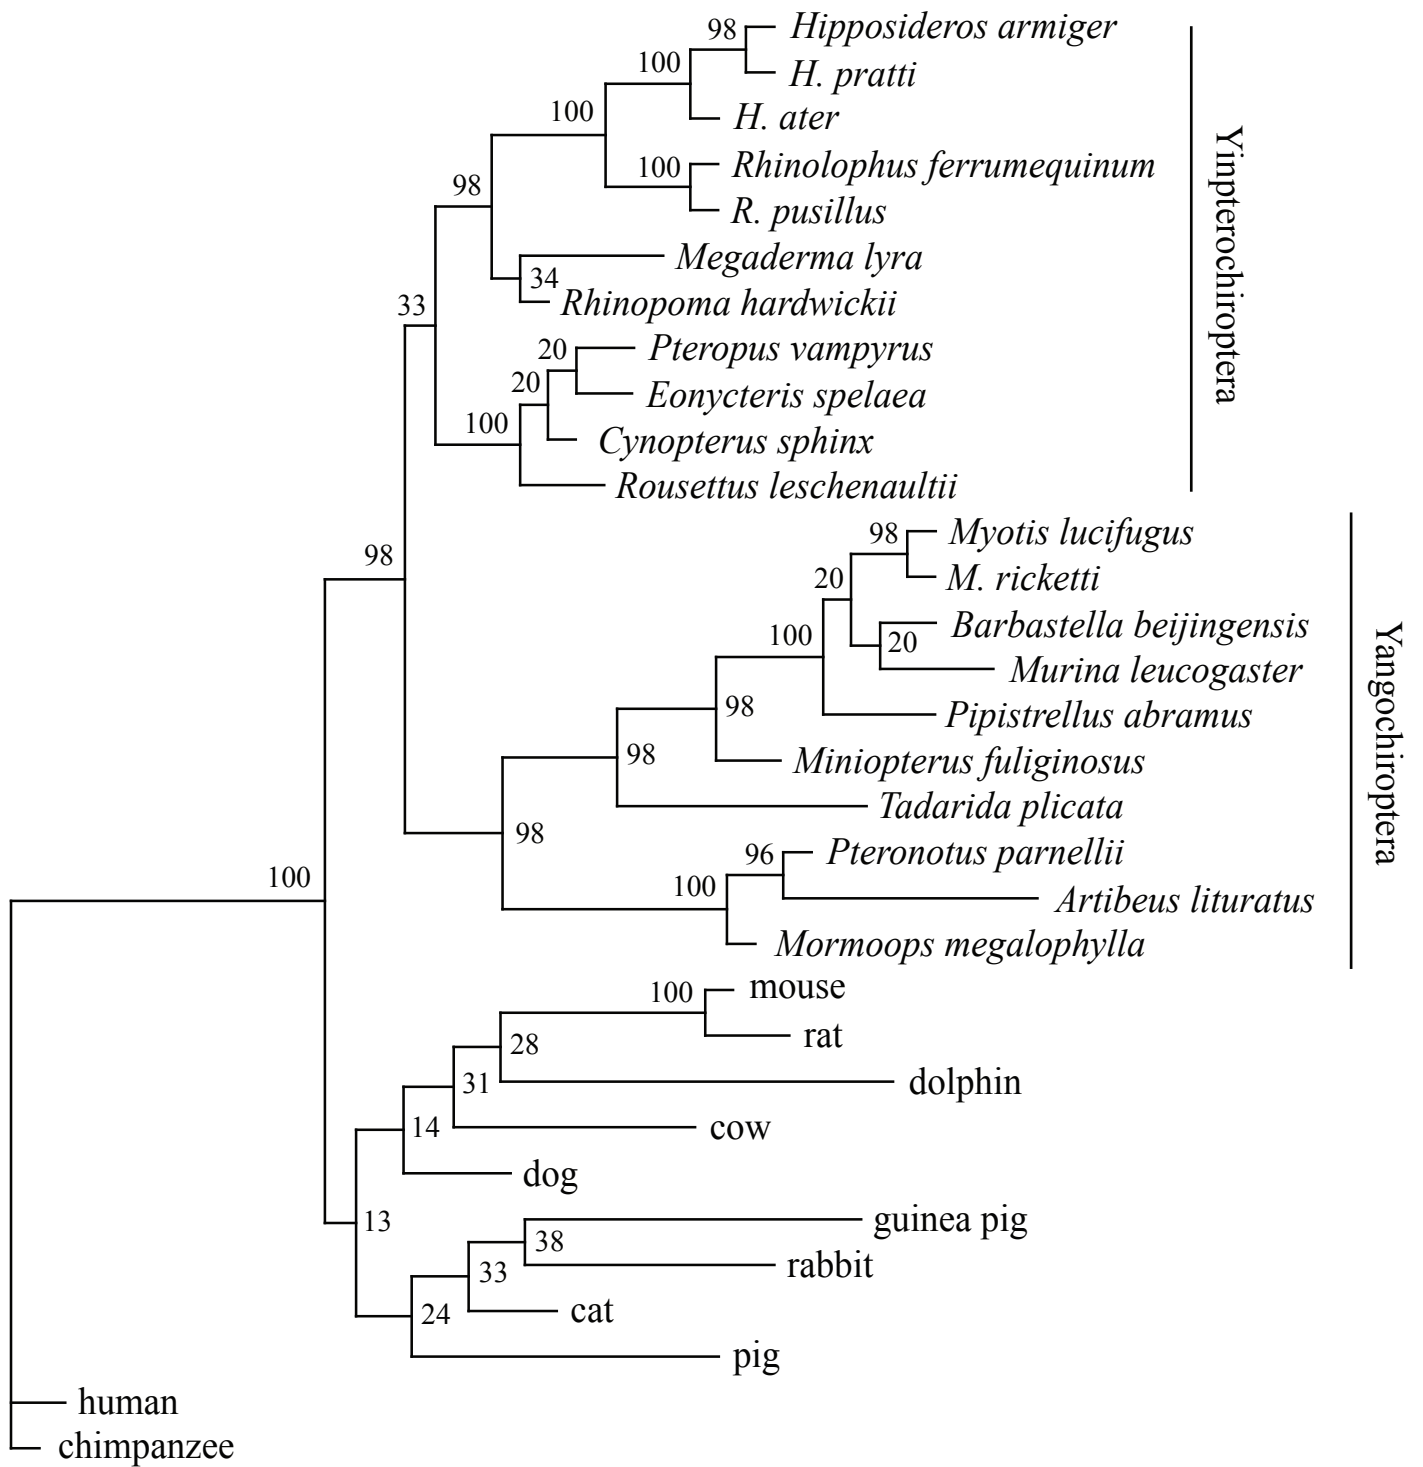

0.1
