# Supplementary material
Source: PubMed Central journal article supplement (PMC3339320)
Supplement: supp_msr310_MSR310_supp_figureS5.pdf [file supp_msr310_MSR310_supp_figureS5.pdf]

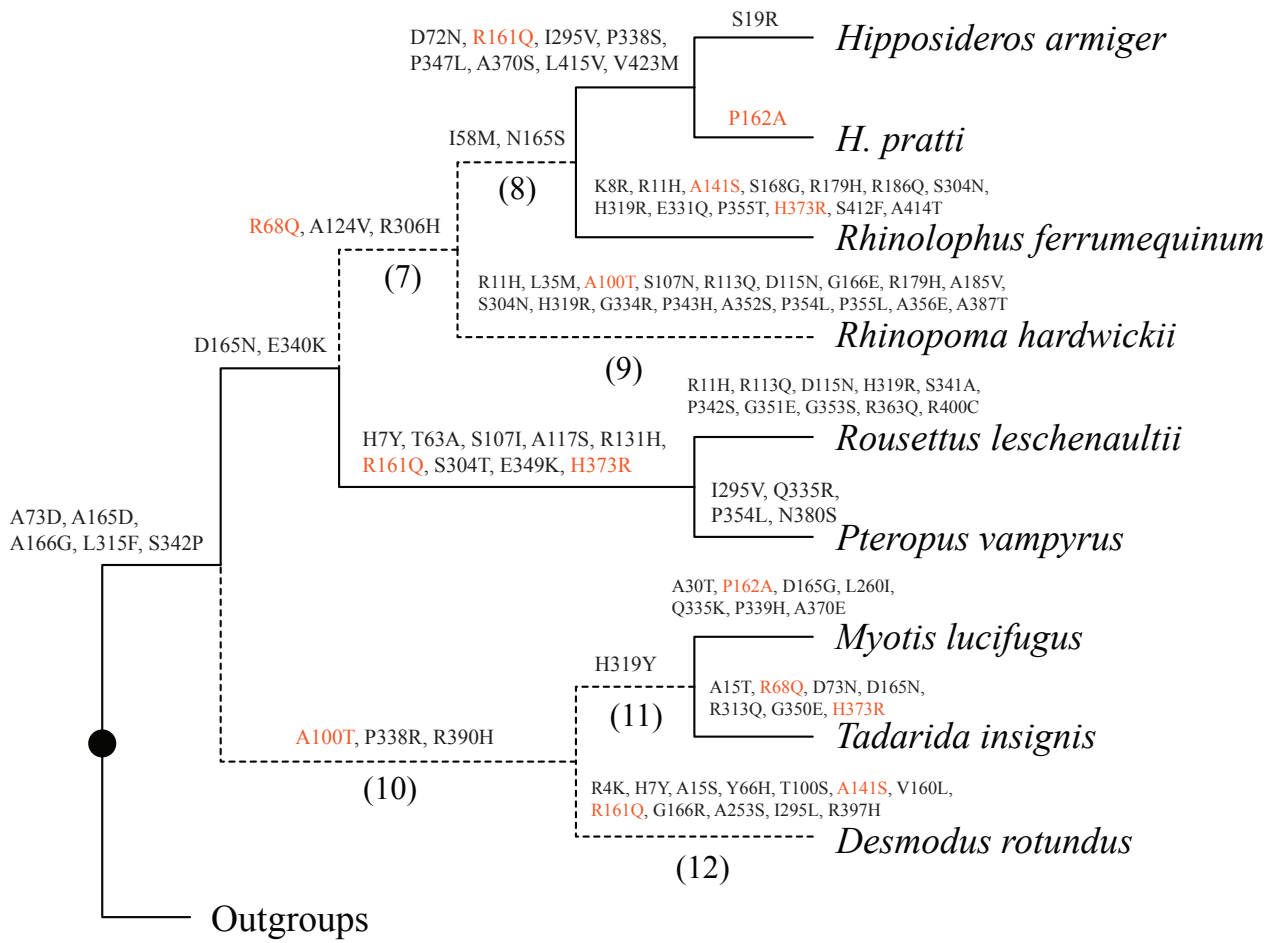

Suborder  
Yimpterochiroptera

Suborder  
Yangochiroptera
